# Supplementary material for: Prevalence of Drug Resistance Mycobacterium Tuberculosis among Patients Seen in Coast Provincial General Hospital, Mombasa, Kenya
Source: PLOS journal article supplement (doi:10.1371/journal.pone.0163994), 2016-10-06
Supplement: S5 (10.1371/journal.pone.0163994.s005) [file journal.pone.0163994.s005]

**S5 Table. Statistical significant correlations between HIV status and TB co-infection.**

Pearson Chi-Square analysis showed no significant statistical correlation between HIV status and TB co-infection since the corresponding p-value is greater than 0.05

|                    | Value | df | Asymp. Sg. (2-sided) |
|--------------------|-------|----|----------------------|
| Pearson Chi-Square | 5.031 | 4  |                      |
| N of Valid Cases   | 258   |    | .968                 |
