# Supplementary material for: Prevalence of Drug Resistance Mycobacterium Tuberculosis among Patients Seen in Coast Provincial General Hospital, Mombasa, Kenya
Source: PLOS journal article supplement (doi:10.1371/journal.pone.0163994), 2016-10-06
Supplement: S7 (10.1371/journal.pone.0163994.s007) [file journal.pone.0163994.s007]

**S7 table. Statistical significant correlations between HIV status and FLD.**

Pearson Chi-Square analysis, showing no significant statistical relationship between HIV status and FLD.

|                              | Value              | df | Asymp. Sig. (2-sided) |
|------------------------------|--------------------|----|-----------------------|
| Pearson Chi-Square           | 5.623 <sup>a</sup> | 6  | .467                  |
| Likelihood ratio             | 6.352              | 6  | 3.85                  |
| Linear-by-Linear Association | 3.348              | 1  | .067                  |
| N of valid Cases             |                    |    |                       |

a. 9 cells (97.5%) have expected count less than 5. The minimum expected count is .19
